# Supplementary material for: Treatment choice for first permanent molars affected with molar-incisor hypomineralization, in patients 7–8 years of age: a questionnaire study among Swedish general dentists, orthodontists, and pediatric dentists
Source: Springer Nature journal article supplement (doi:10.1007/s40368-023-00860-9), 2024-02-01
Supplement: MOESM1 [file 26701980]

# Frågor om behandling av tänder med mineraliseringsstörning och sönderfall

Allmäntandläkare verksamma i Folktandvården Västra Götaland är utvalda för att besvara denna enkät, deltagande i enkäten är förankrat via folktandvårdens ledning.

Nedan följer några fall med tänder som drabbats av sönderfall till följd av mineraliseringsstörning. I varje fall ombeds du svara på vilken behandling du väljer. Fallen är från barn 7-8 år. Som underlag till varje fall finns kliniska foto, panoramaröntgen, profilröntgen samt foto på studiemodeller. Ingen ytterligare information om patienten delges, i syfte att hitta verktyg för behandlingsstrategier baserat på omfattning av tandsönderfall. Det tar ca 20 minuter att besvara frågorna.

Dina svar är helt anonyma.  
Stort tack för dina svar!

Agneta Robertson, Birgitta Jälevik, Emina Čirgić, Nina Sabel och Adnan Hajdarević

\*Obligatorisk

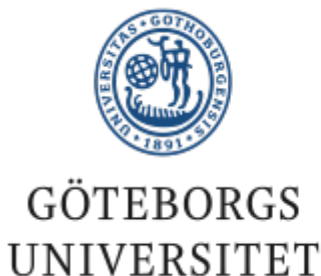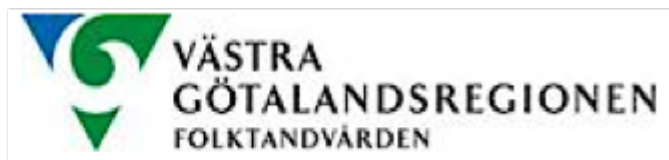

Frågor om dig som besvarar frågorna:

1. Vilket år fick du din tandläkarexamen? \*

---

2. 2. Vilket kön tillhör du? \*

*Markera endast en oval.*

- Kvinna
- Man
- Vill ej ange

3. 3. Hur många timmar per vecka arbetar du kliniskt med barn och ungdomstandvård? \*

*Markera endast en oval.*

- < 10 timmar
- 10-19 timmar
- 20-30 timmar
- > 30 timmar
- Inte kliniskt verksam

FALL 1

FALL 1

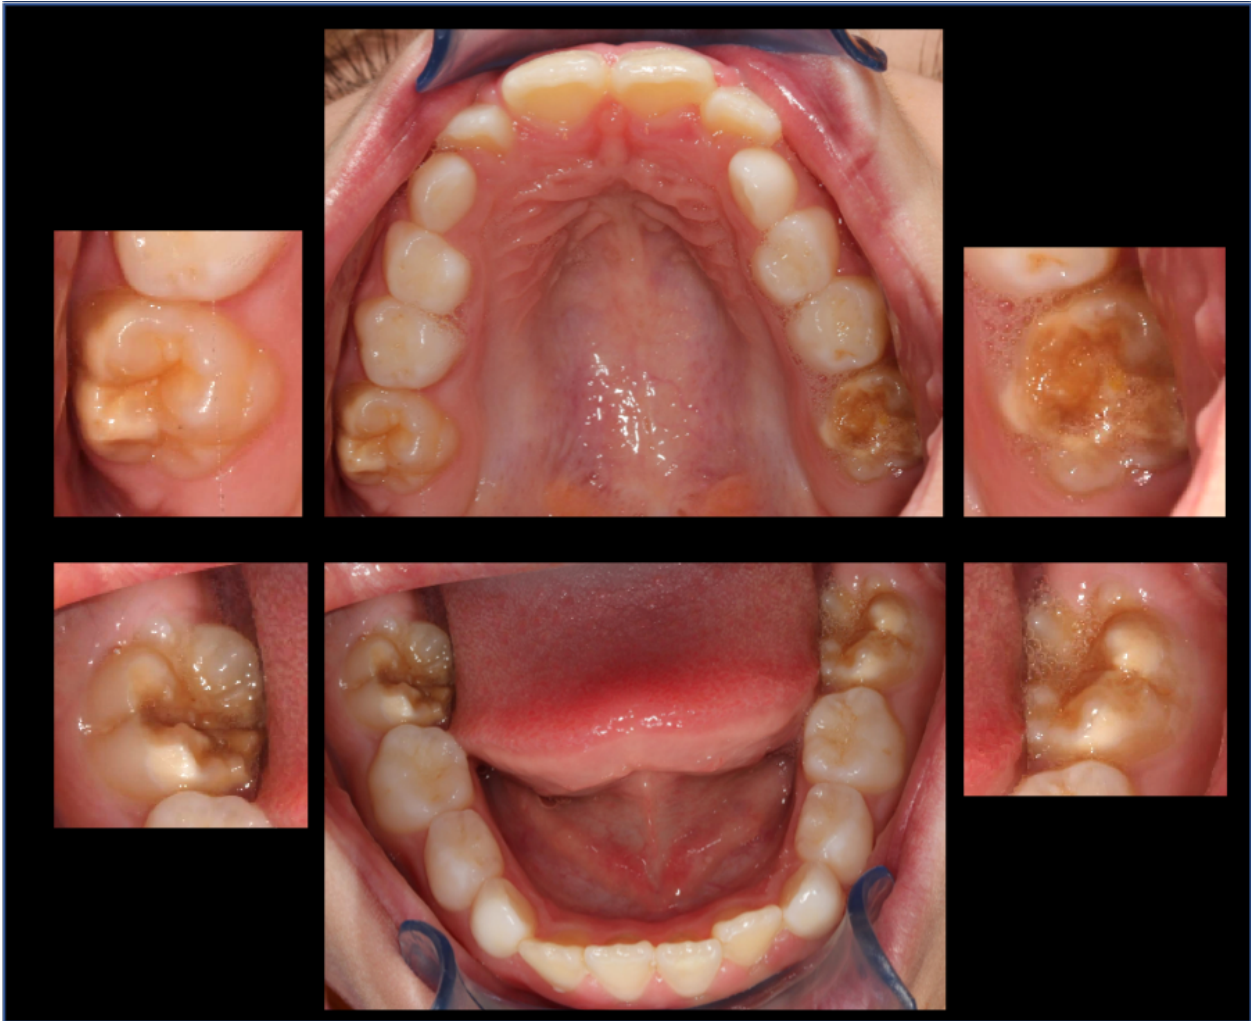

FALL 1

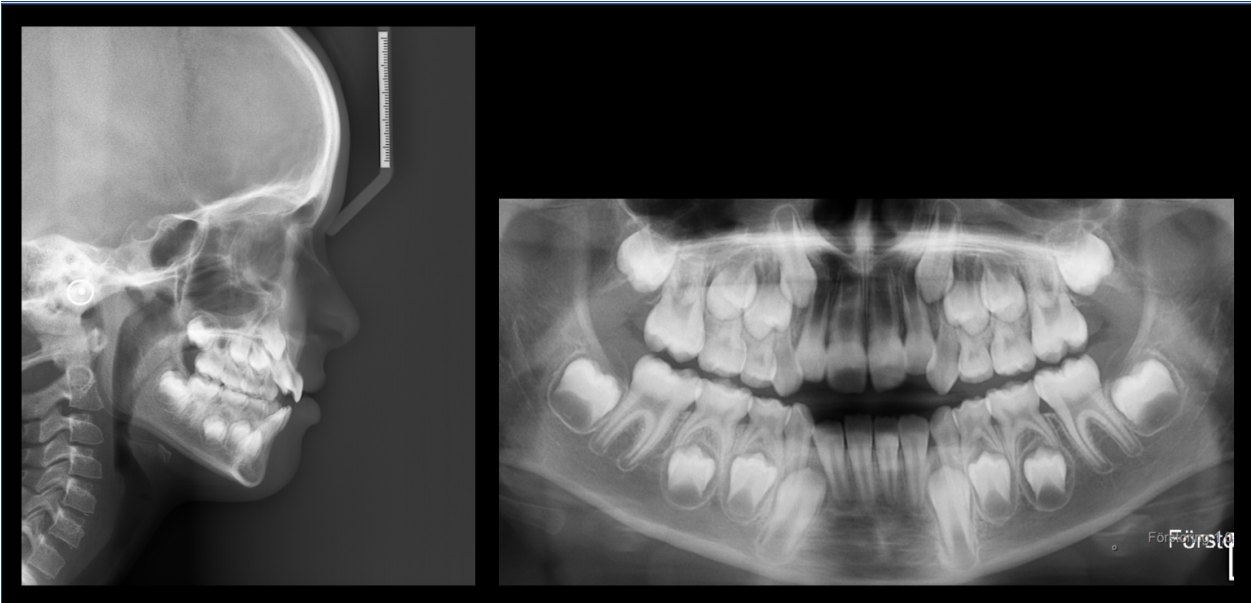

FALL 1

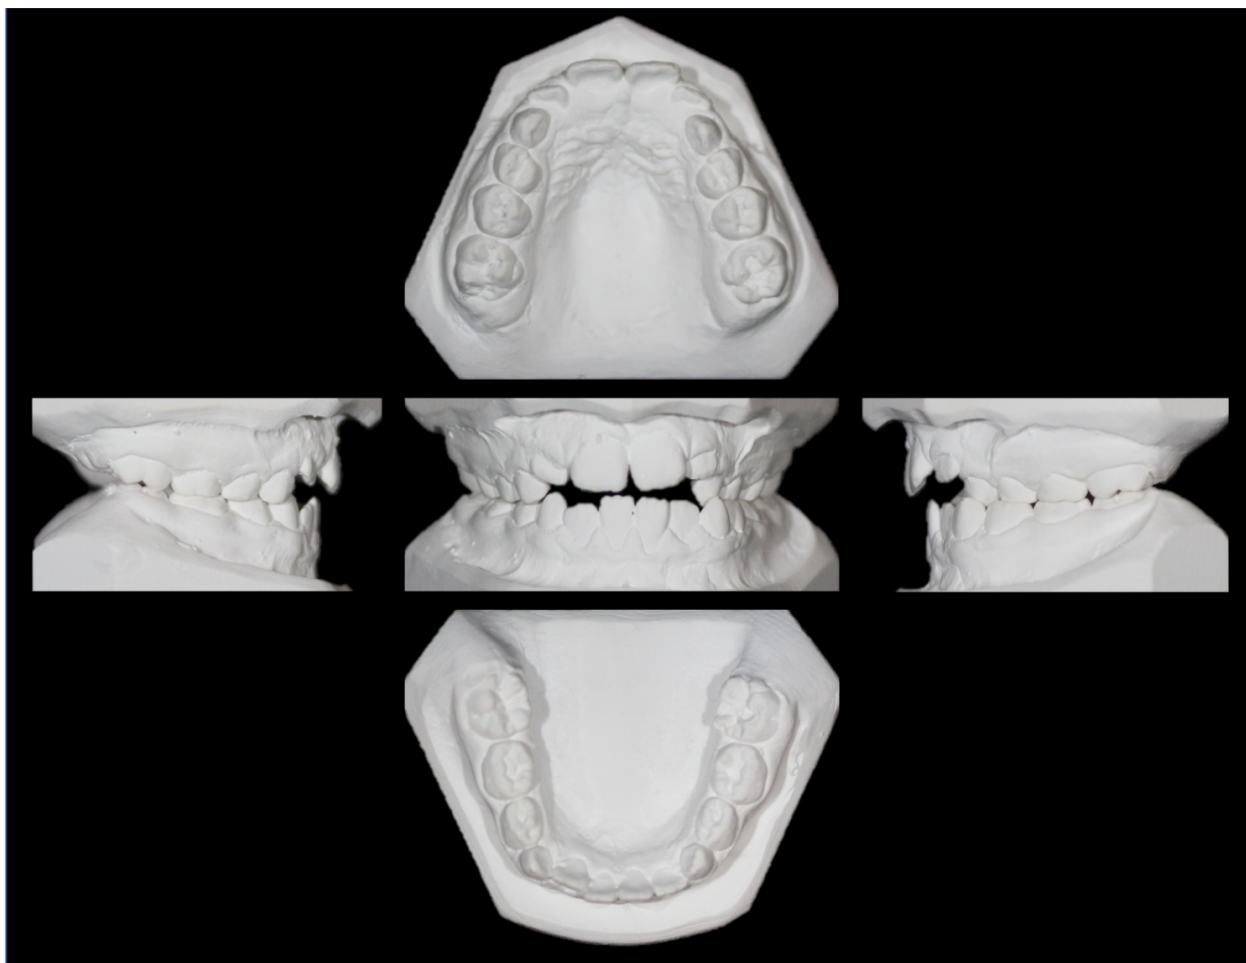

4. 1.1 Vilken behandling väljer du för tand 16? \*

*Markera endast en oval.*

- Lagning med komposit
- Lagning med glasjonomer
- Stålkrona
- Kron- eller inläggsterapi
- Extraktion
- Utökad fluorbehandling
- Ekpektans

5. 1.2 Vilken behandling väljer du för tand 26? \*

*Markera endast en oval.*

- Lagning med komposit
- Lagning med glasjonomer
- Stålkrona
- Kron- eller inläggsterapi
- Extraktion
- Utökad fluorbehandling
- Expektans

6. 1.3 Vilken behandling väljer du för tand 36? \*

*Markera endast en oval.*

- Lagning med komposit
- Lagning med glasjonomer
- Stålkrona
- Kron- eller inläggsterapi
- Extraktion
- Utökad fluorbehandling
- Expektans

7. 1.4 Vilken behandling väljer du för tand 46? \*

*Markera endast en oval.*

- Lagning med komposit
- Lagning med glasjonomer
- Stålkrona
- Kron- eller inläggsterapi
- Extraktion
- Utökad fluorbehandling
- Expektans

FALL 2

FALL 2

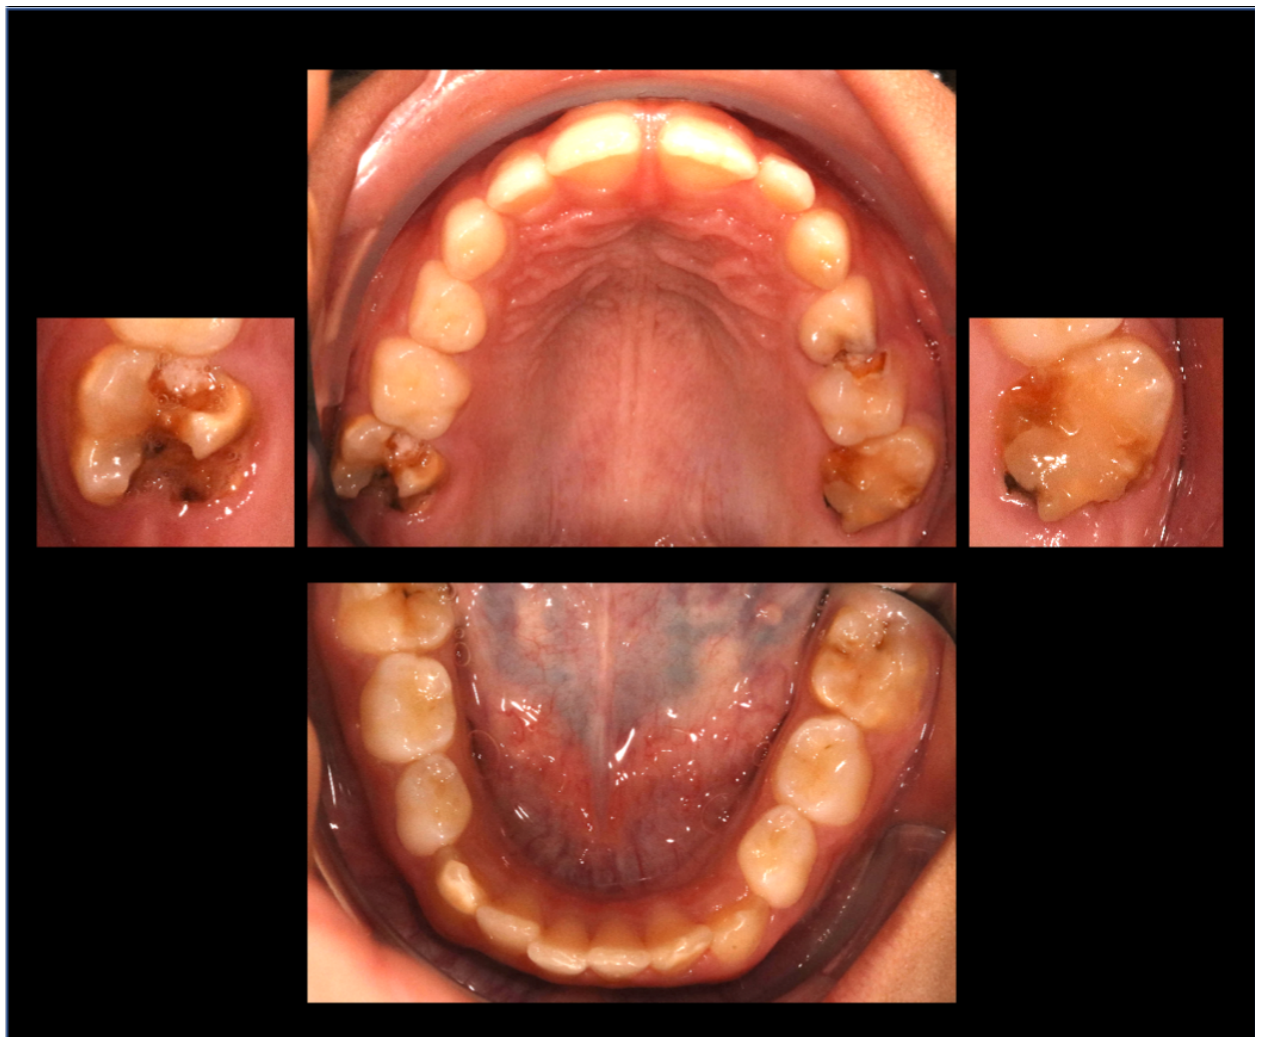

FALL 2

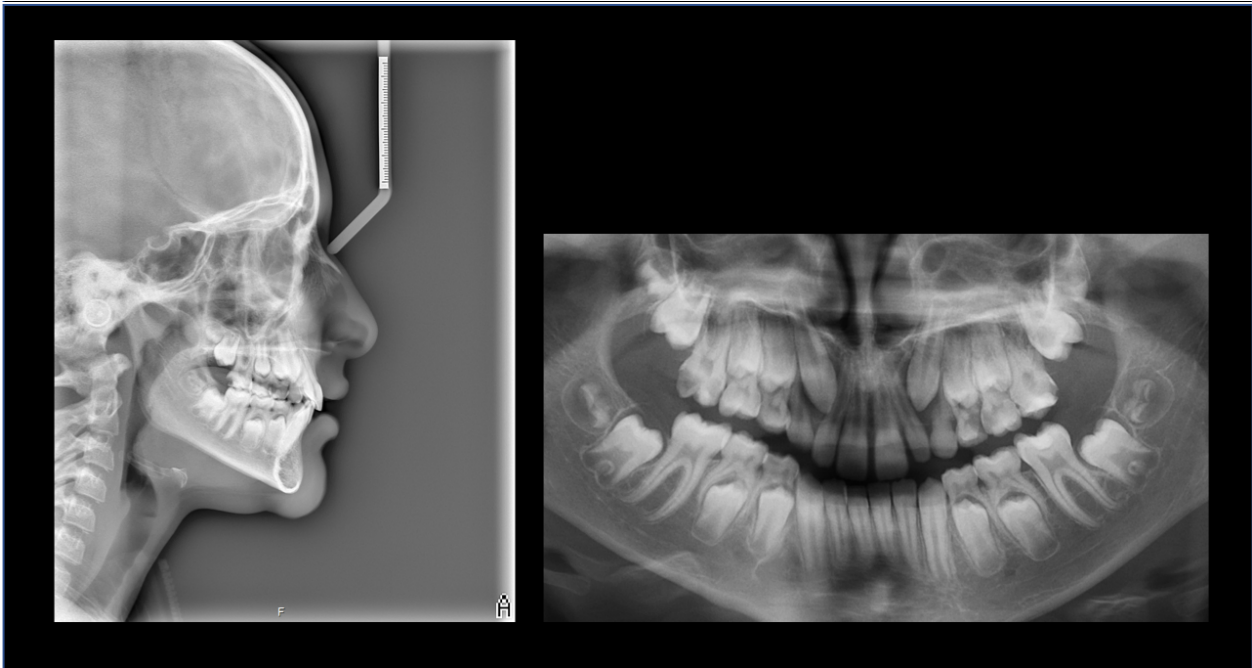

FALL 2

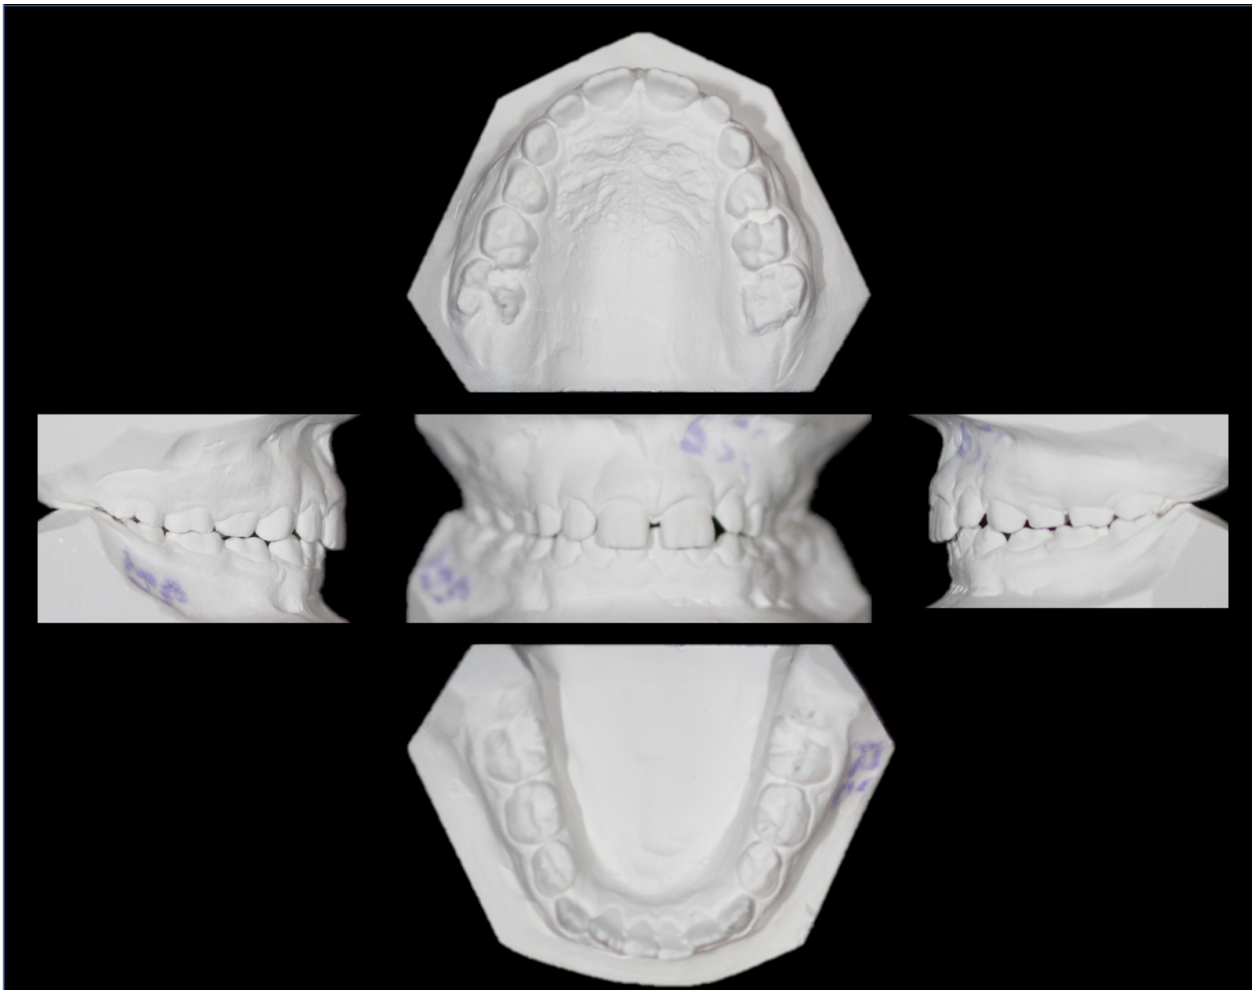

8. 2.1 Vilken behandling väljer du för tand 16? \*

*Markera endast en oval.*

- Lagning med komposit
- Lagning med glasjonomer
- Stålkrona
- Kron- eller inläggsterapi
- Extraktion
- Utökad fluorbehandling
- Ekpekatns

9. 2.2 Vilken behandling väljer du för tand 26? \*

*Markera endast en oval.*

- Lagning med komposit
- Lagning med glasjonomer
- Stålkrona
- Kron- eller inläggsterapi
- Extraktion
- Utökad fluorbehandling
- Expektans

10. 2.3 Vilken behandling väljer du för tand 36? \*

*Markera endast en oval.*

- Lagning med komposit
- Lagning med glasjonomer
- Stålkrona
- Kron- eller inläggsterapi
- Extraktion
- Utökad fluorbehandling
- Expektans



11. 2.4 Vilken behandling väljer du för tand 46? \*

*Markera endast en oval.*

- Lagning med komposit
- Lagning med glasjonomer
- Stålkrona
- Kron- eller inläggsterapi
- Extraktion
- Utökad fluorbehandling
- Expektans

FALL 3

FALL 3

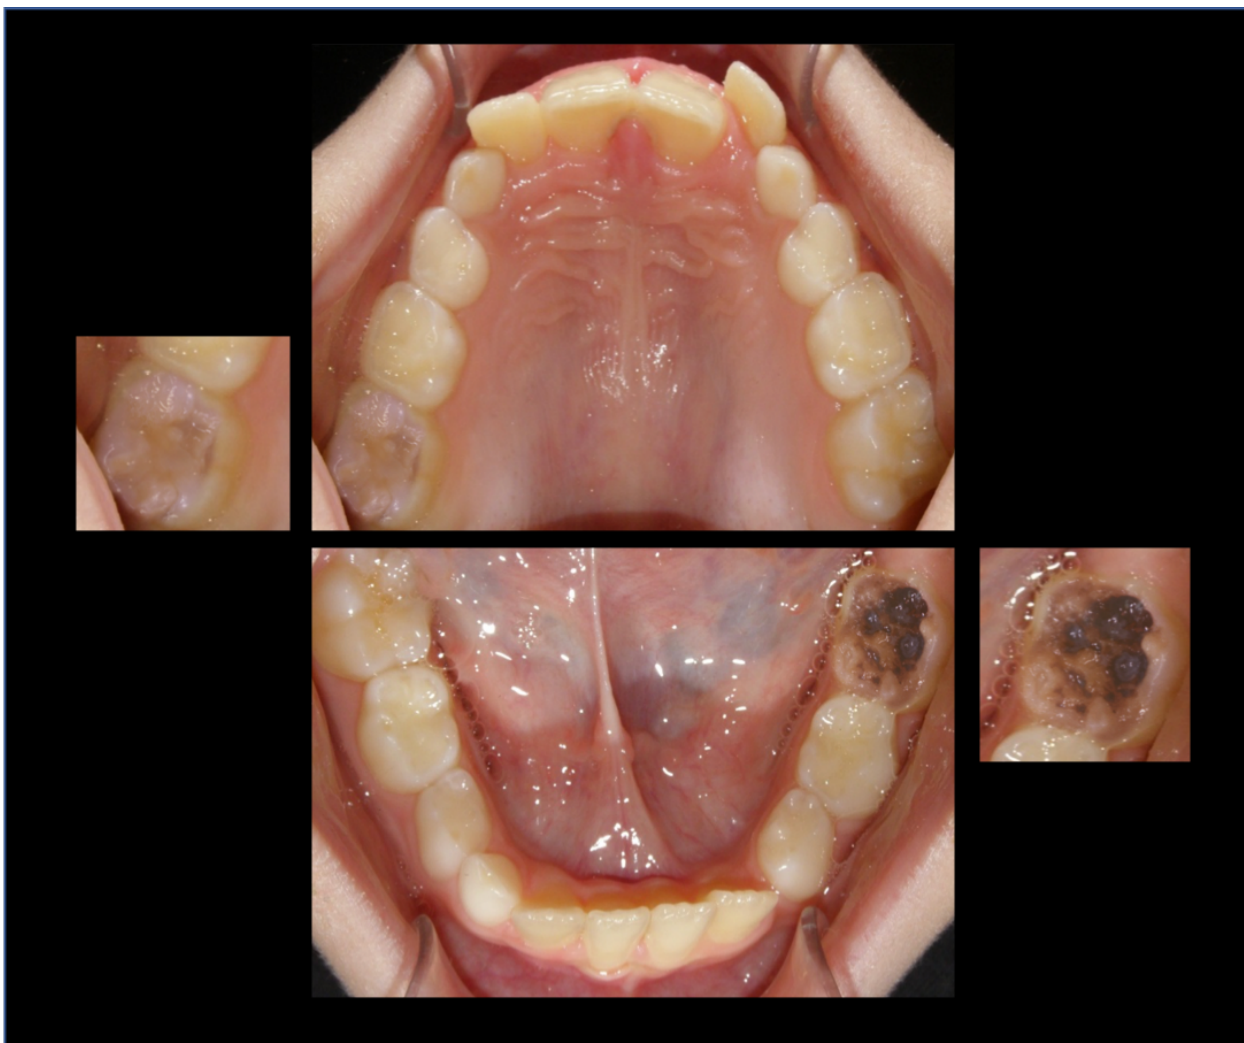

FALL 3

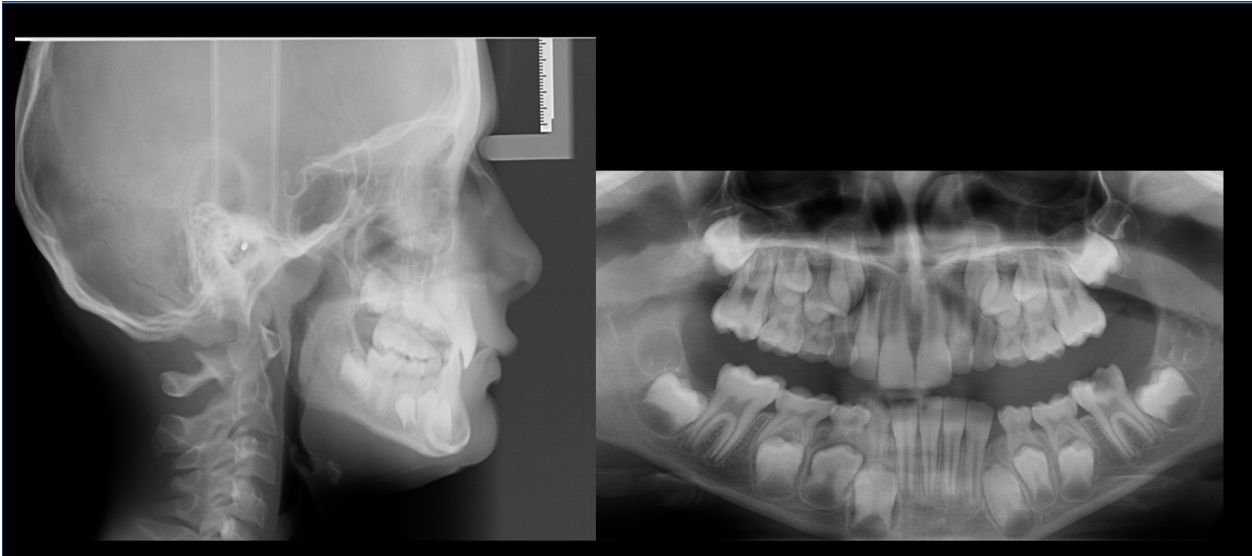

FALL 3

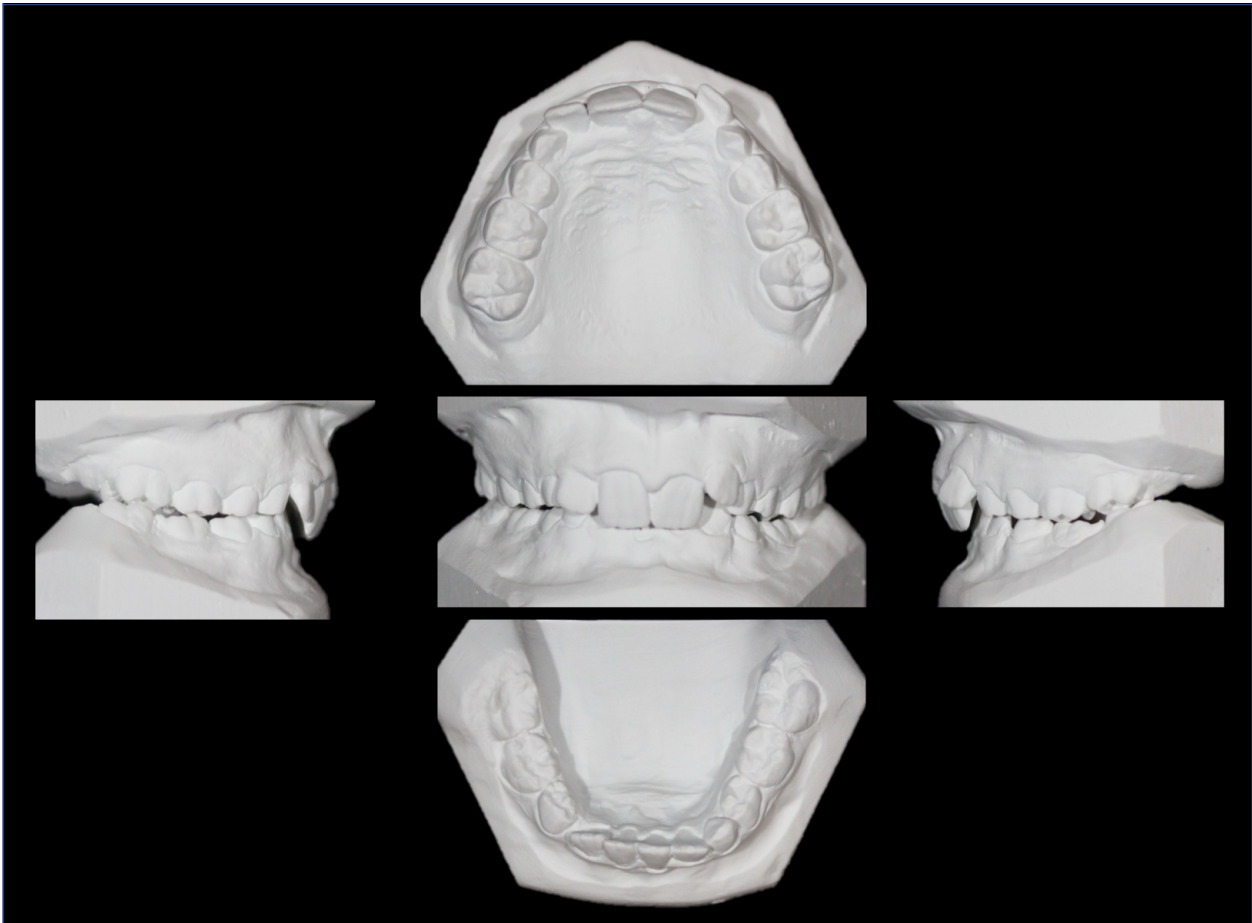

12. 3.1 Vilken behandling väljer du för tand 16? \*

*Markera endast en oval.*

- Lagning med komposit
- Lagning med glasjonomer
- Stålkrona
- Kron- eller inläggsterapi
- Extraktion
- Utökad fluorbehandling
- Expektans

13. 3.2 Vilken behandling väljer du för tand 26? \*

*Markera endast en oval.*

- Lagning med komposit
- Lagning med glasjonomer
- Stålkrona
- Kron- eller inläggsterapi
- Extraktion
- Utökad fluorbehandling
- Expektans

14. 3.3 Vilken behandling väljer du för tand 36? \*

*Markera endast en oval.*

- Lagning med komposit
- Lagning med glasjonomer
- Stålkrona
- Kron- eller inläggsterapi
- Extraktion
- Utökad fluorbehandling
- Expektans

15. 3.4 Vilken behandling väljer du för tand 46? \*

*Markera endast en oval.*

- Lagning med komposit
- Lagning med glasjonomer
- Stålkrona
- Kron- eller inläggsterapi
- Extraktion
- Utökad fluorbehandling
- Expektans

FALL 4

FALL 4

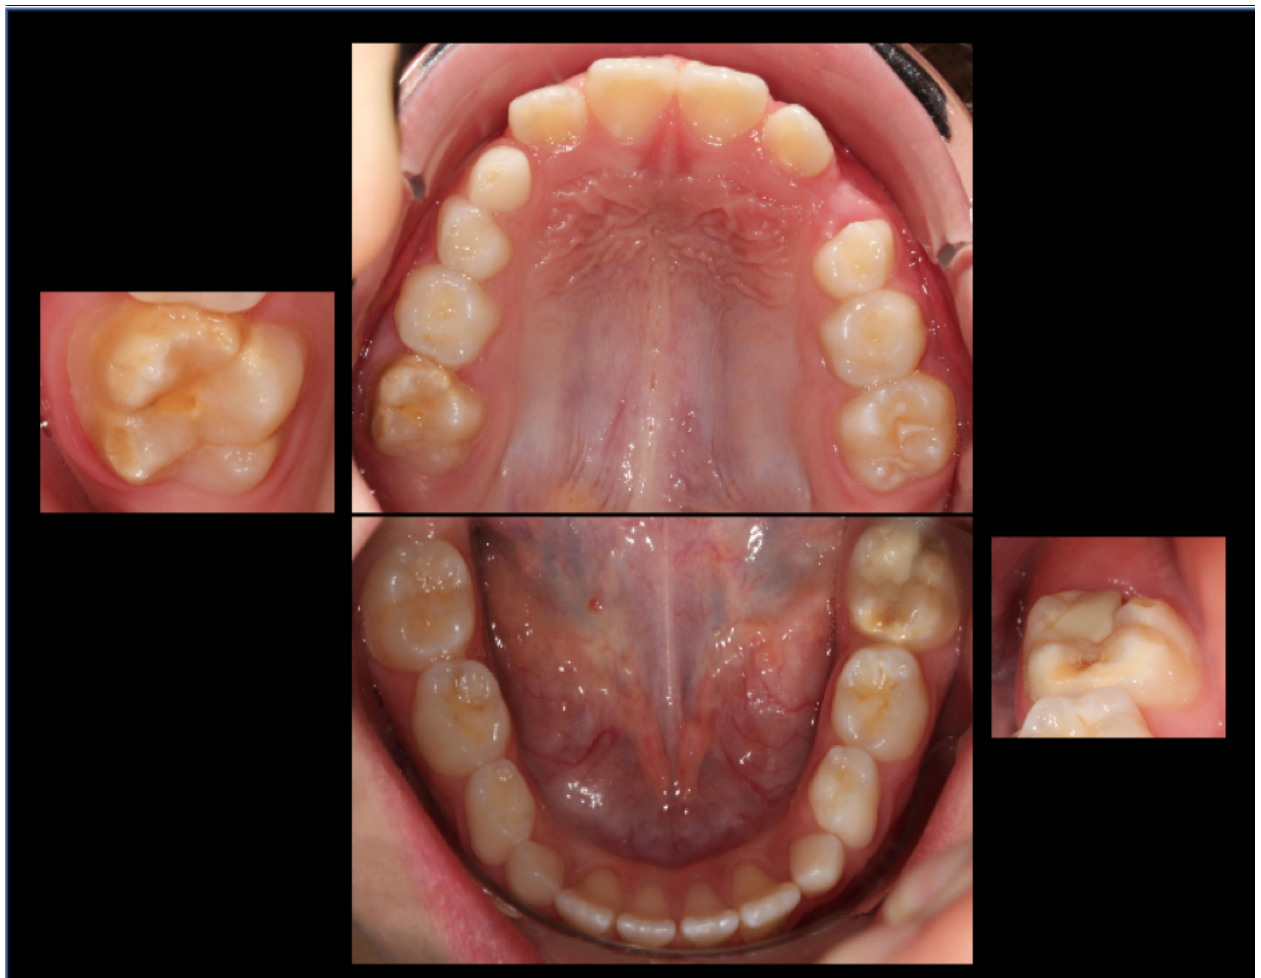

FALL 4

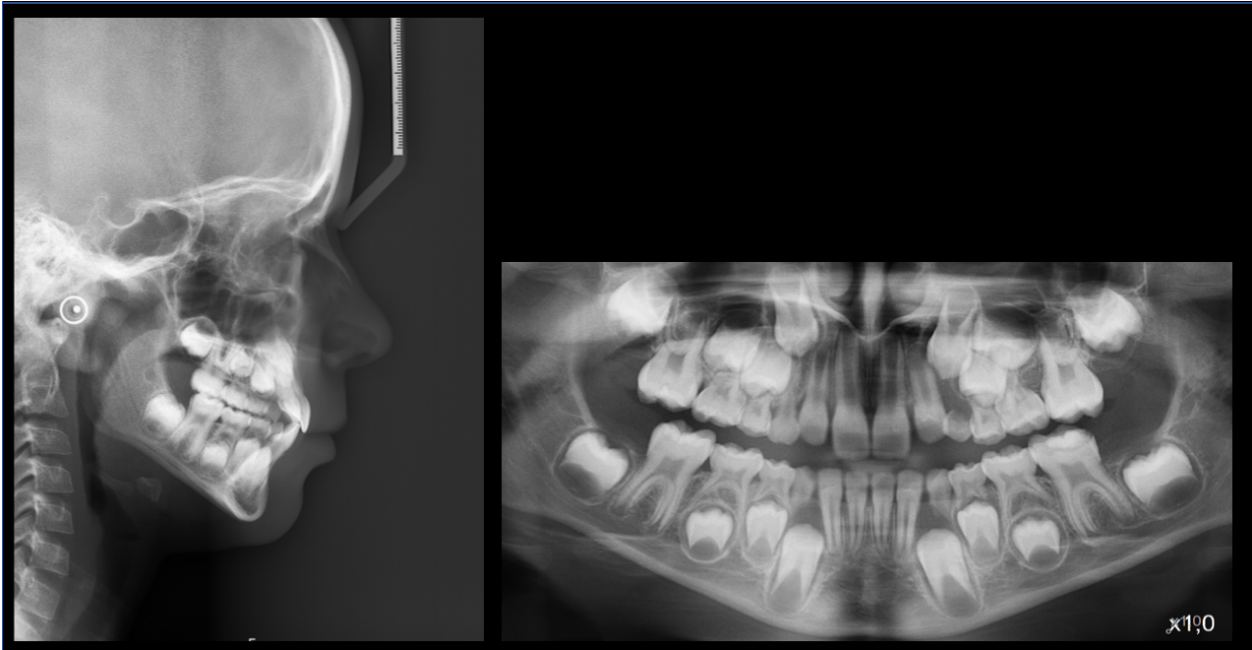

FALL 4

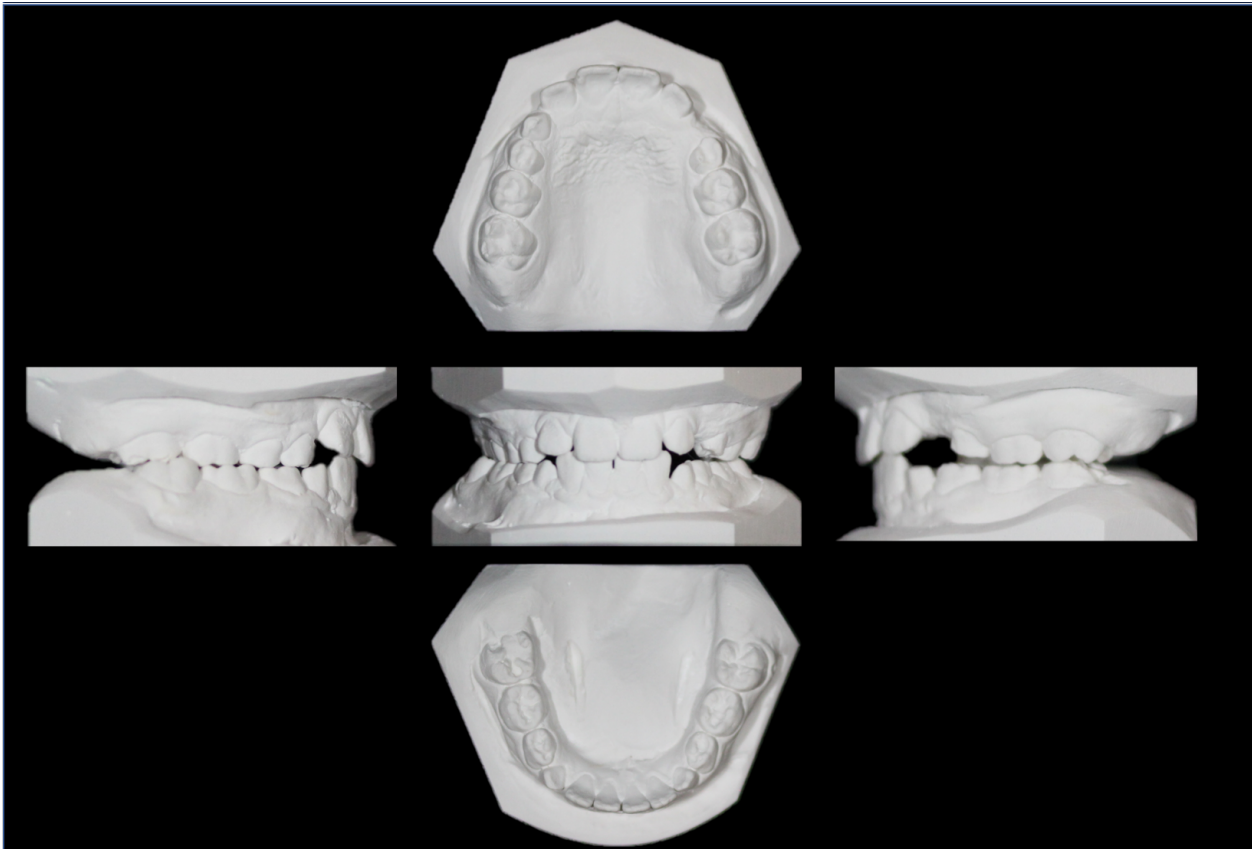

16. 4.1 Vilken behandling väljer du för tand 16? \*

*Markera endast en oval.*

- Lagning med komposit
- Lagning med glasjonomer
- Stålkrona
- Kron- eller inläggsterapi
- Extraktion
- Utökad fluorbehandling
- Expektans

17. 4.2 Vilken behandling väljer du för tand 26? \*

*Markera endast en oval.*

- Lagning med komposit
- Lagning med glasjonomer
- Stålkrona
- Kron- eller inläggsterapi
- Extraktion
- Utökad fluorbehandling
- Expektans

18. 4.3 Vilken behandling väljer du för tand 36? \*

*Markera endast en oval.*

- Lagning med komposit
- Lagning med glasjonomer
- Stålkrona
- Kron- eller inläggsterapi
- Extraktion
- Utökad fluorbehandling
- Expektans

19. 4.4 Vilken behandling väljer du för tand 46? \*

*Markera endast en oval.*

- Lagning med komposit
- Lagning med glasjonomer
- Stålkrona
- Kron- eller inläggsterapi
- Extraktion
- Utökad fluorbehandling
- Expektans

FALL 5

FALL 5

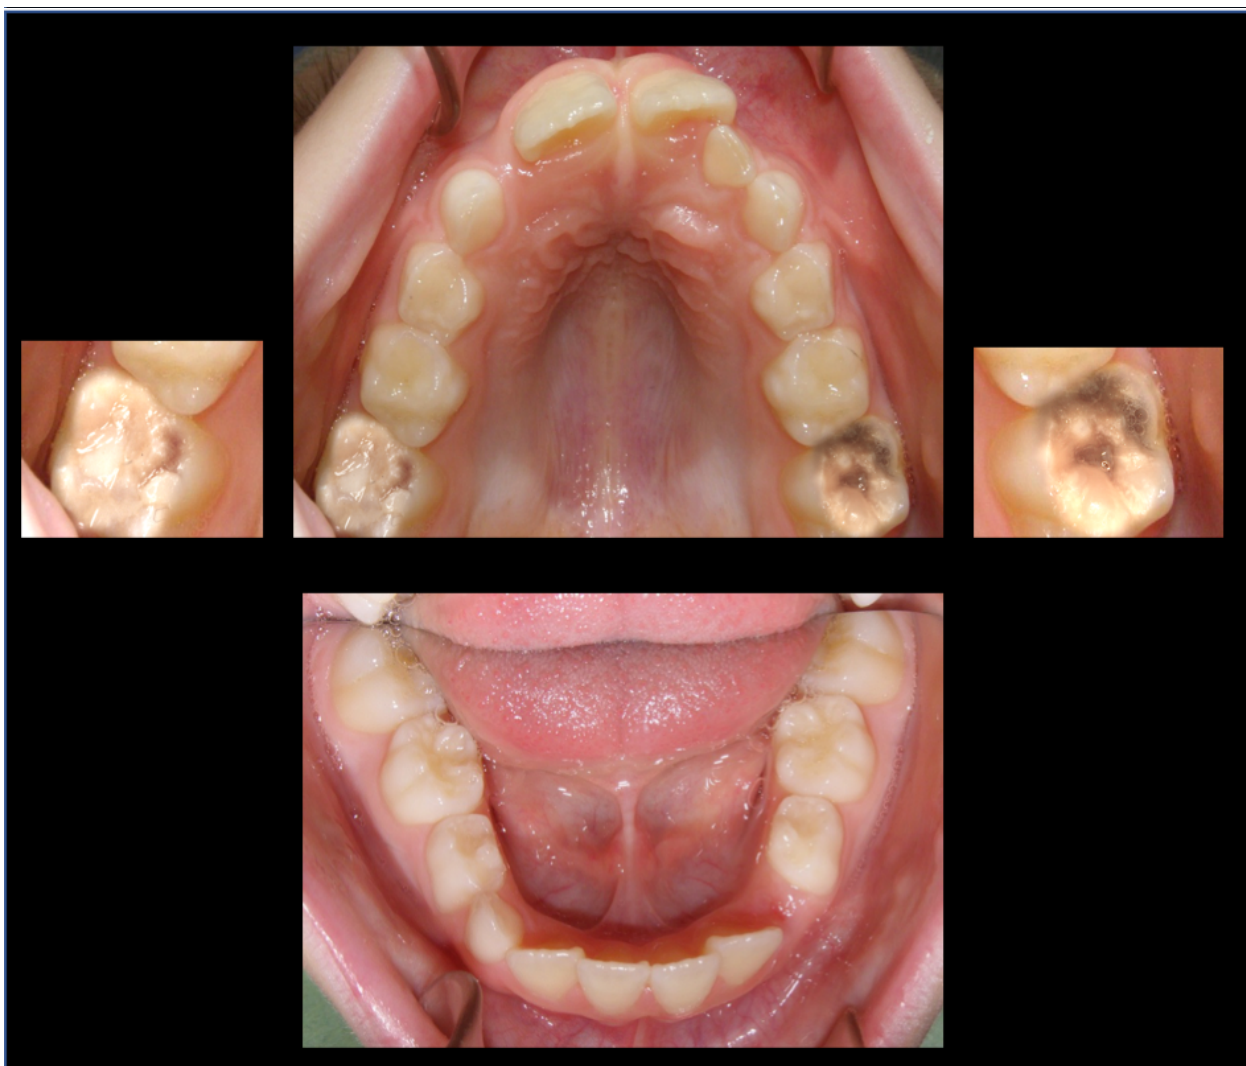

FALL 5

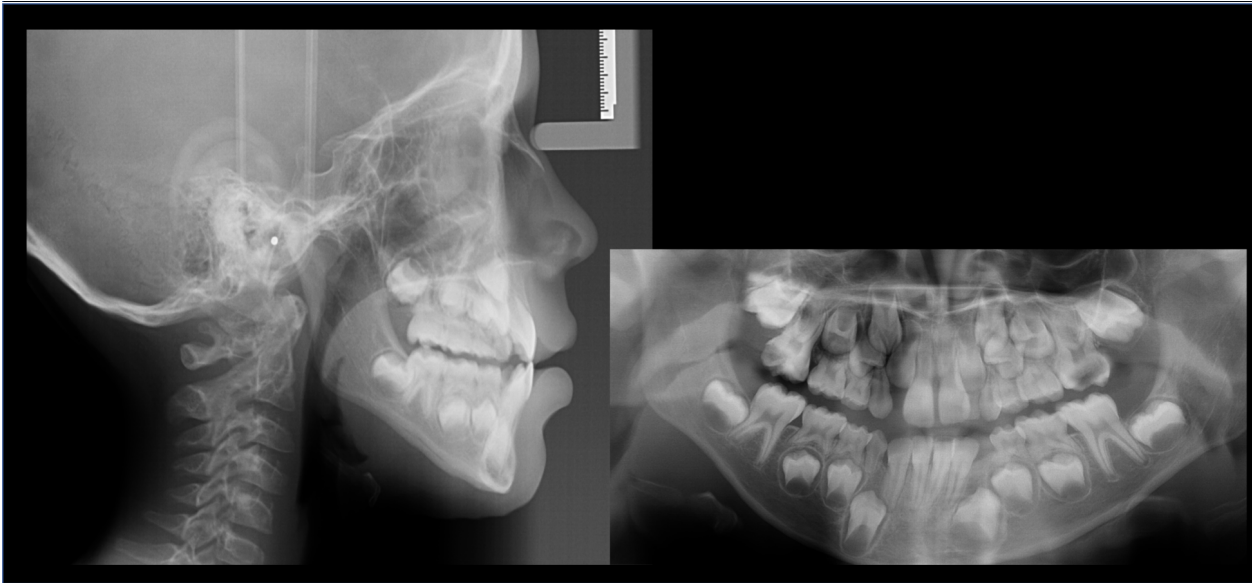

FALL 5

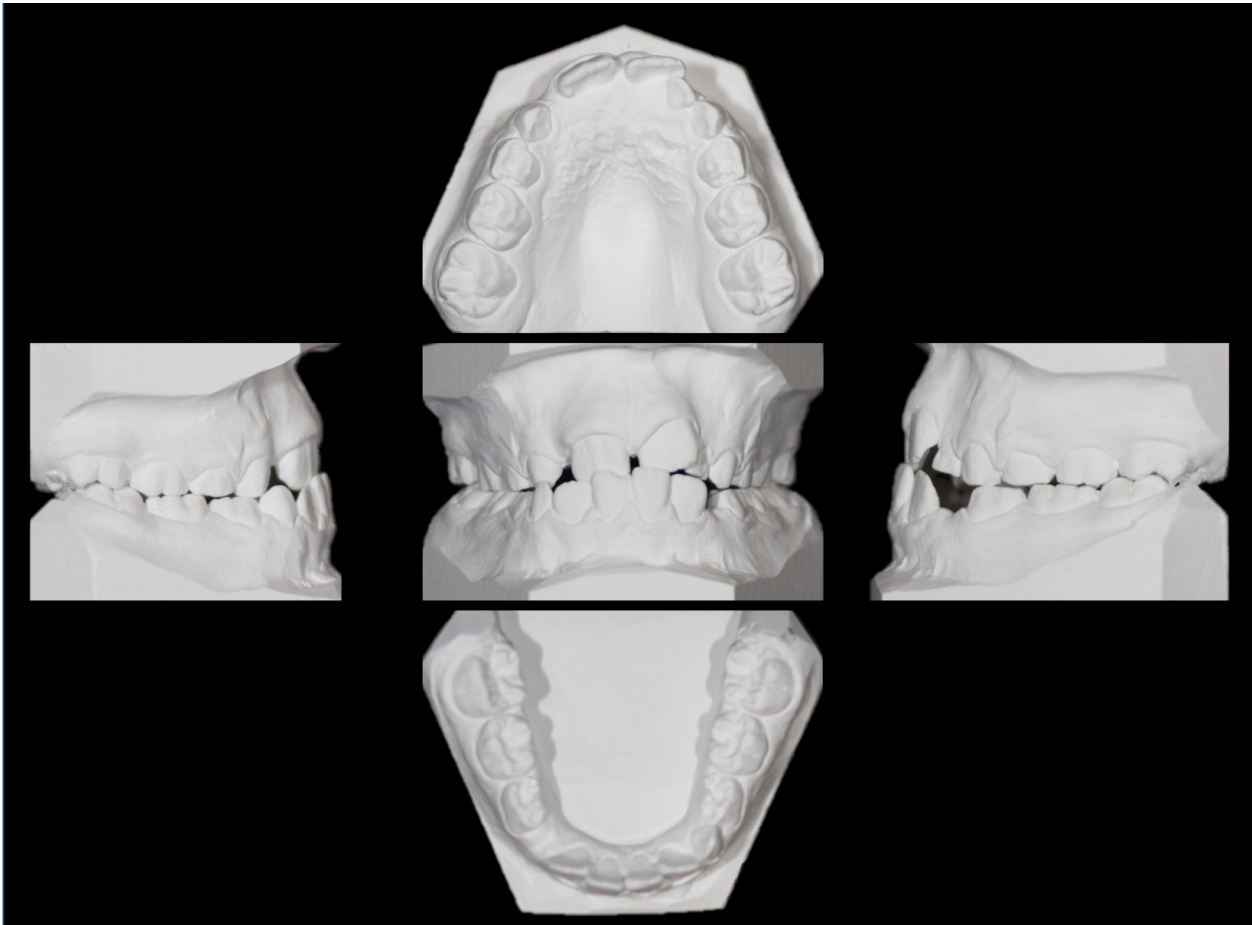



20. 5.1 Vilken behandling väljer du för tand 16? \*

*Markera endast en oval.*

- Lagning med komposit
- Lagning med glasjonomer
- Stålkrona
- Kron- eller inläggsterapi
- Extraktion
- Utökad fluorbehandling
- Expektans

21. 5.2 Vilken behandling väljer du för tand 26? \*

*Markera endast en oval.*

- Lagning med komposit
- Lagning med glasjonomer
- Stålkrona
- Kron- eller inläggsterapi
- Extraktion
- Utökad fluorbehandling
- Expektans

22. 5.3 Vilken behandling väljer du för tand 36? \*

*Markera endast en oval.*

- Lagning med komposit
- Lagning med glasjonomer
- Stålkrona
- Kron- eller inläggsterapi
- Extraktion
- Utökad fluorbehandling
- Expektans

23. 5.4 Vilken behandling väljer du för tand 46? \*

*Markera endast en oval.*

- Lagning med komposit
- Lagning med glasjonomer
- Stålkrona
- Kron- eller inläggsterapi
- Extraktion
- Utökad fluorbehandling
- Expektans

FALL 6

FALL 6

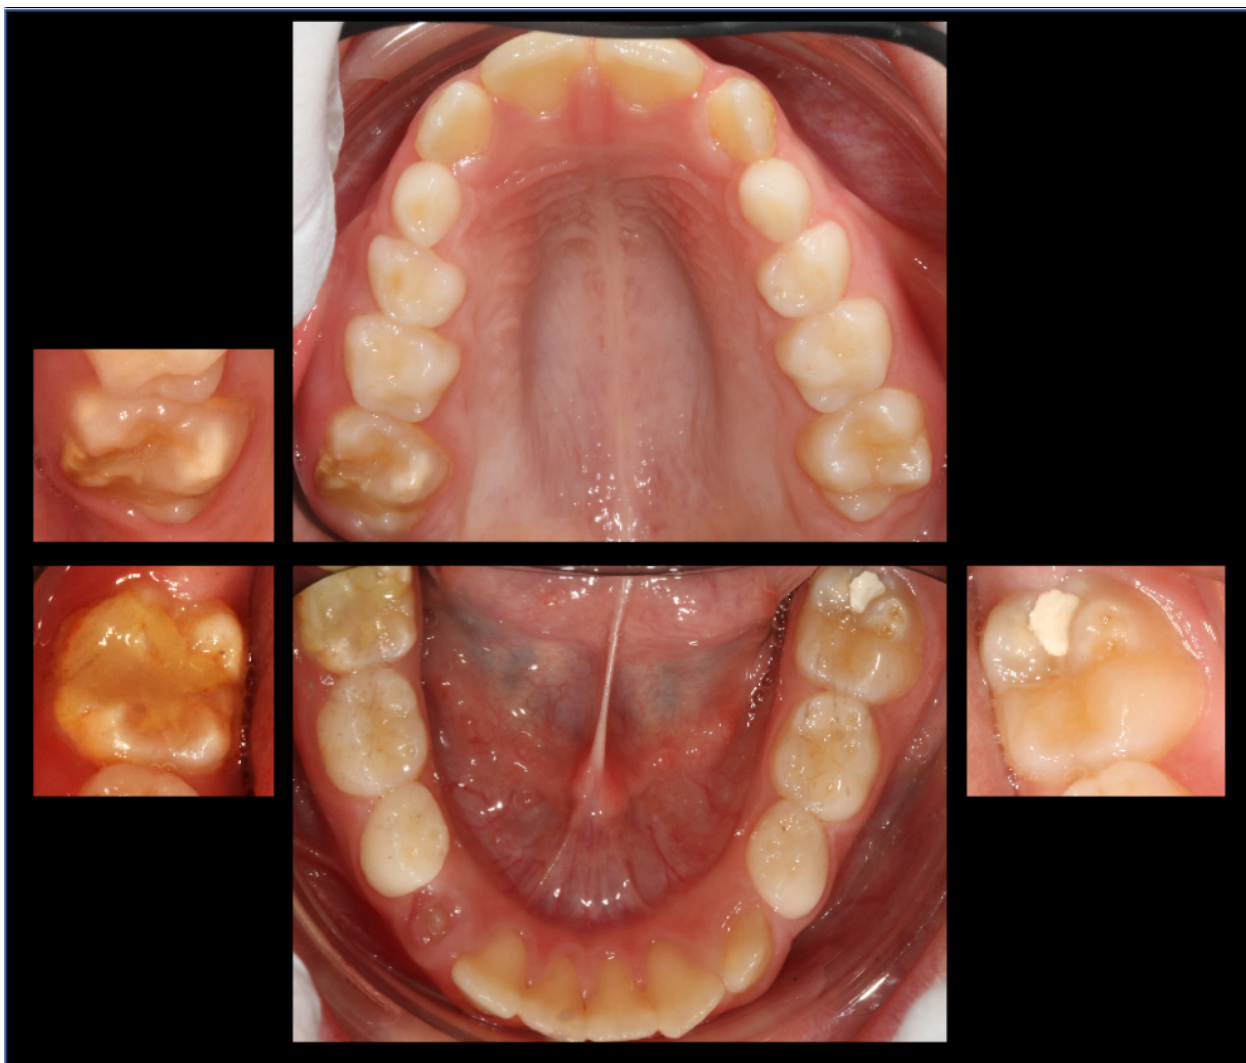

FALL 6

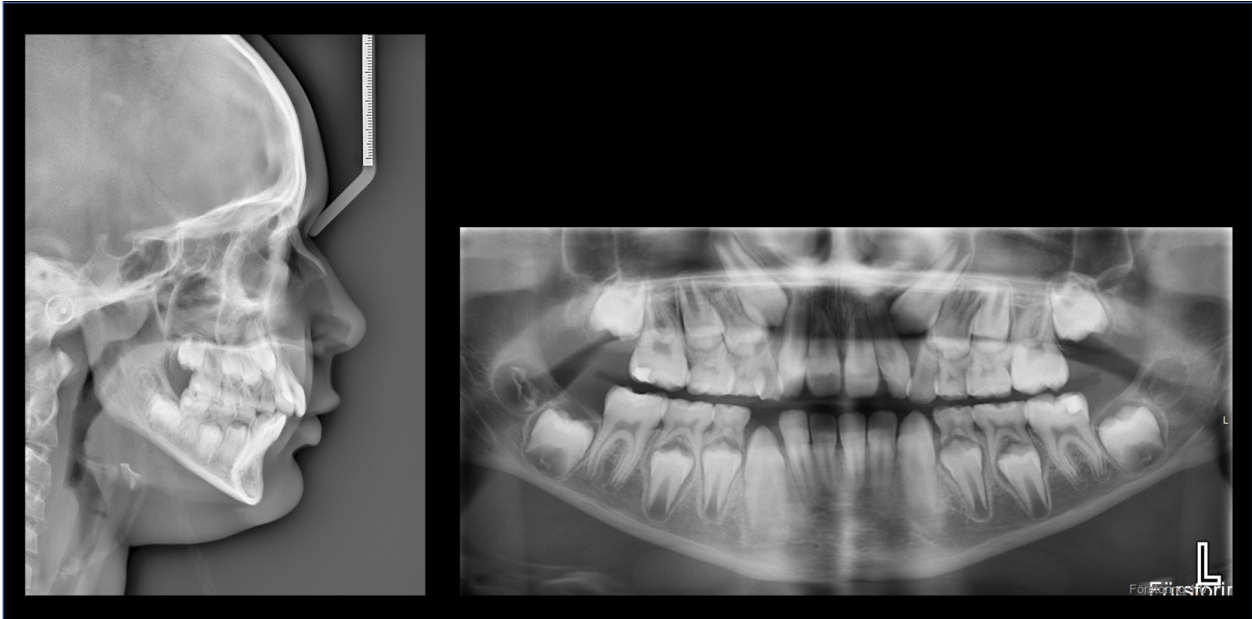

FALL 6

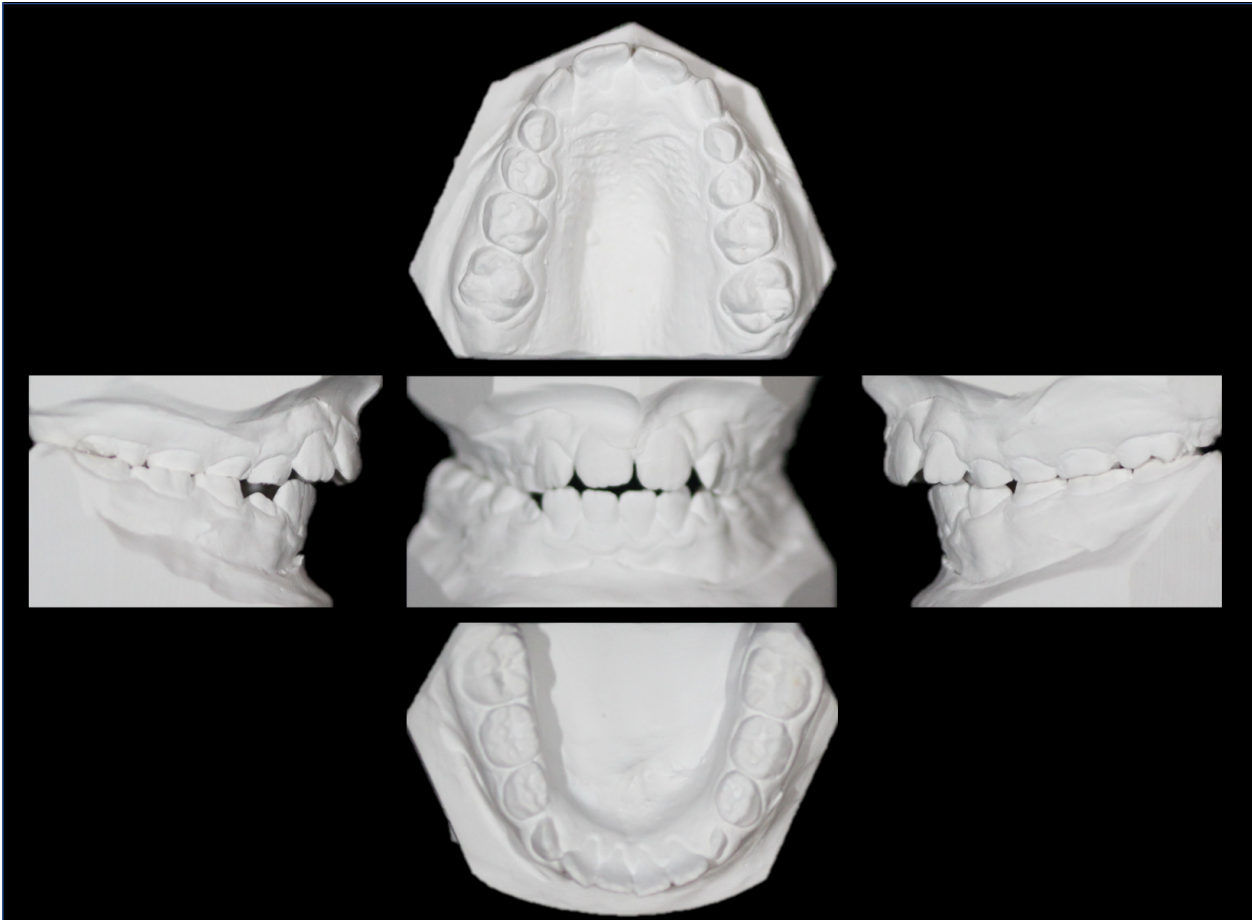

24. 6.1 Vilken behandling väljer du för tand 16? \*

*Markera endast en oval.*

- Lagning med komposit
- Lagning med glasjonomer
- Stålkrona
- Kron- eller inläggsterapi
- Extraktion
- Utökad fluorbehandling
- Expektans

25. 6.2 Vilken behandling väljer du för tand 26? \*

*Markera endast en oval.*

- Lagning med komposit
- Lagning med glasjonomer
- Stålkrona
- Kron- eller inläggsterapi
- Extraktion
- Utökad fluorbehandling
- Expektans

26. 6.3 Vilken behandling väljer du för tand 36? \*

*Markera endast en oval.*

- Lagning med komposit
- Lagning med glasjonomer
- Stålkrona
- Kron- eller inläggsterapi
- Extraktion
- Utökad fluorbehandling
- Expektans

27. 6.4 Vilken behandling väljer du för tand 46? \*

*Markera endast en oval.*

- Lagning med komposit
- Lagning med glasjonomer
- Stålkrona
- Kron- eller inläggsterapi
- Extraktion
- Utökad fluorbehandling
- Expektans

### Generella frågor

28. 11.1 Om du väljer extraktion av 6:a med gravt sönderfall, när utför du den? \*

*Markera endast en oval.*

- Direkt vid diagnos
- Vid ca 8-9 års ålder?
- När man ser 7:ans rotfurkation (rotutveckling) på röntgen
- När 7:an börjar eruptera
- När 7:an är i ocklusion
- Övrigt: \_\_\_\_\_

29. 11.2 Vad baserar du oftast dina beslut på, konserverande behandling eller extraktion, vid grav MIH? \*

*Markera endast en oval.*

- Klinisk erfarenhet
- Forskning
- Lokala riktlinjer
- Rekommendation av ortodontist
- Rekommendation av pedodontist

TACK FÖR DINA SVAR! Komihåg att trycka på knappen "skicka".

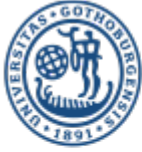

GÖTEBORGS  
UNIVERSITET

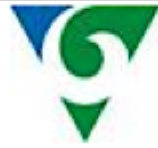

VÄSTRA  
GÖTALANDSREGIONEN  
FOLKTANDVÅRDEN

---

Det här innehållet har varken skapats eller godkänts av Google.

Google Formulär
